# Supplementary material for: CH-RUN: A data-driven spatially contiguous runoff monitoring product for Switzerland
Source: Copernicus journal article supplement (doi:10.5194/egusphere-2024-993), 2024-04-22
Supplement: Supplementary file [file egusphere-2024-993-AC2-supplement.pdf]

**CH-RUN: A data-driven spatially contiguous runoff monitoring product for Switzerland; <https://doi.org/10.5194/egusphere-2024-993>**

**Response to reviewer #2 (Ross Woods); <https://doi.org/10.5194/egusphere-2024-993-RC2>**

Comment 1

*L287 “Figure 5c illustrates how the models capture spatial patterns of annual trends”. I’m not confident that the results in Fig 5c are robust. First, since there is no evidence shown that temporal trends for individual catchments are linear, it would be prudent to use a non-parametric trend slope (e.g., Sen slope), rather than a linear fit for each catchment. Second, the PREVAH points in Fig 5c look to be mostly a cloud, and it seems possible that the two points in the upper right have a lot of influence in determining the regression line. I suggest the authors either demonstrate that those two points are not influential by recomputing the regression without them and showing that it does not change much, or else use a robust regression method. Similar comments apply to the influence of the single LSTM point in the upper right. The use of a Pearson correlation coefficient to describe the association between variables in Fig 5c seems similarly unjustified, and Spearman rank correlations would be more appropriate in the presence of potential outliers. I list this as a major comment because the paper includes in its conclusion (L464) the claim that “Our model effectively captured ... long-term trends”*

We agree with this criticism of our trend analysis. We followed your suggestion and used Sen’s slope to compute the robust trend per catchment. To reduce the impact of outliers for the comparison of observed and simulated trends, we use robust estimates for regression and Spearman's rank correlation.

With this robust analysis, the difference between CH-RUN and PREVAH are slightly reduced, but still, CH-RUN reproduces linear trends better with rank correlation  $\rho=0.6$ , compared to PREVAH with  $\rho=0.42$ . Both models appear to reproduce the trends less accurately compared to the previous analysis.

The updated results:

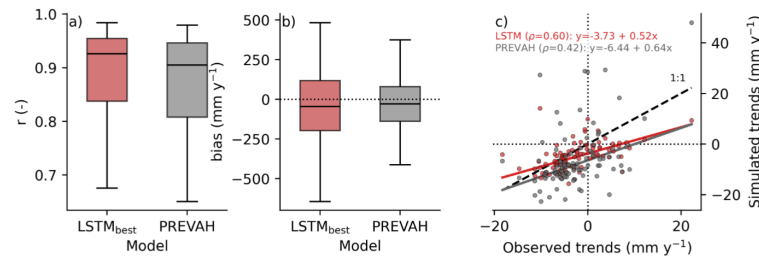

**Figure 5.** Catchment-level evaluation at the annual scale. a) The Pearson correlation ( $r$ ) and b) bias in  $\text{mm y}^{-1}$  distribution across 98 training catchments evaluated on the test set. c) The simulated annual runoff trends compared to observations. The points represent the linear trend (found by robustified least squares fit) of single catchments. Note that for the trend calculation, the time range from 1995 (start of first test period) to 2020 (end of second test period) was used. The inset equation shows the linear least square fit and the corresponding rank correlations.

For a reconstruction product, it is crucial to adequately represent yearly variability and long-term trends. We, therefore, evaluate this aspect on annual runoff aggregates (Fig. 5). The best-performing model, LSTM<sub>best</sub>, represented the interannual variability (Fig. 5a), quantified as the Pearson correlation coefficient between the annual values for each catchment, well with a median of  $r = 0.93$ , and with 75 % of catchments above  $r = 0.85$ . The bias averages close to zero and for 50 % of the catchments, it was in the range of  $-250$  to  $250 \text{ mm y}^{-1}$  (Fig. 5b). On the interannual variability, PREVAH showed a slightly lower correlation (Fig. 5a) across catchments with a median of  $r = 0.91$ . In terms of bias, PREVAH performed marginally better with a median closer to zero and a lower spread (Fig. 5b).

Figure 5c illustrates how the models captured spatial patterns of annual trends between January 1995 and December 2020 (Fig. 5c). The agreement was calculated by first computing the catchment-level linear trends for the observations and the simulations by PREVAH and LSTM<sub>best</sub> independently using the robust Theil-Sen estimator (Sen, 1968). Then, we fit a regression between the observed and estimated trend slopes by the two models using robust regression with Huber weighting and the default tuning constant of  $c = 1.345$  (Huber and Ronchetti, 2009). This approach reduces the impact of outliers by giving lower weight to large residuals. For quantifying the alignment of the simulated trends, we use Spearman correlation ( $\rho$ ), which is relatively robust against outliers. While the LSTM<sub>best</sub> represented the spatial patterns of the linear trend relatively well with a correlation of  $\rho = 0.60$ , PREVAH achieved a correlation of  $\rho = 0.42$ . Both models underestimated the strength of negative and positive trends with slopes of 0.52 (LSTM<sub>best</sub>) and 0.64 (PREVAH), and they exhibited small negative biases of  $-3.73$  (LSTM<sub>best</sub>) and  $-6.44$  (PREVAH)  $\text{mm y}^{-1}$ .

Also, we changed the statement “Our model effectively captured ... long-term trends”:

## 6 Conclusions

In this study, we developed a data-driven daily runoff reconstruction product for Switzerland, spanning from 1962 to 2023. Our model not only matched but also surpassed the performance of an operational hydrological model at the catchment level. This achievement is particularly noteworthy considering the reduced data requirements, a limitation necessary to achieve such an extensive reconstruction period. Our model effectively captured daily runoff patterns and interannual variability, and represents long-term trends decently, providing a comprehensive and satisfying depiction of runoff dynamics.

### Comment 2

[2] L2. I would like to read slightly more detail about the method in the abstract. A few additional key words to let the reader know which specific machine learning technique(s) was preferred.

Indeed, the abstract did not provide much information about the methods used. We will add more details on the machine learning techniques used in the revised version.

The updated abstract:

**Abstract.**

This study presents a data-driven reconstruction of daily runoff that covers the entirety of Switzerland over an extensive period from 1962 to 2023. To this end, we harness the capabilities of deep learning-based models to learn complex runoff-generating processes directly from observations, thereby facilitating efficient large-scale simulation of runoff rates at ungauged  
5 locations. We test two sequential deep learning architectures, a long short-term memory (LSTM) model, a recurrent neural network able to learn complex temporal features from sequences, and a convolution-based model, which learns temporal dependencies via 1D convolutions in the time domain. The models receive temperature, precipitation, and static catchment properties as input. By driving the resulting model with gridded temperature and precipitation data available since the 1960s,  
10 we provide a spatiotemporally continuous reconstruction of runoff. The efficacy of the developed model is thoroughly assessed through spatiotemporal cross-validation and compared against a distributed hydrological model used operationally in Switzerland.

Comment 3

[3] L10. *“capturing annual variability” it would be clearer to say inter-annual, rather than annual.*

This suggestion will be adopted in the revised manuscript

Comment 4

L12. *“These are characterized by an increased occurrence of dry years, contributing to a negative decadal trend, particularly during the summer months.” A negative trend in what?*

A negative decadal trend in runoff. This will be clarified in the revised version.

Comment 5

L16. *“the reduced data dependency ... of our model” This statement makes sense in the context of comparison against PREVAH, but there are other traditional hydrological models which only require temperature and precipitation (e.g., HBV) which also have reduced data dependency; this is not a feature that is unique to these machine learning models.*

We agree with this comment. There are hydrological models with reduced data dependency and fast computation. We will avoid such a general statement and instead focus on the comparison to PREVAH, which is a state-of-the-art model used operationally in Switzerland. Our approach has a built-in regionalization and performs reasonably well and fast, and has reduced data needs compared to PREVAH.

We changed “reduced data dependency” to “low data requirements”:

Furthermore, the low data requirements and computational efficiency of our model pave the way for simulating diverse  
20 scenarios and conducting comprehensive climate attribution studies. This represents a substantial progression in the field, allowing for the analysis of thousands of scenarios in a time frame significantly shorter than traditional methods.

We also made clear that data requirements are reduced *compared to PREVAH*.

The reconstruction of runoff back to the early 1960s for Switzerland is a novelty enabled by the **reduced data needs** of our deep learning-based approach **compared to the PREVAH model**. Here, we evaluate the plausibility of the simulated patterns based on Fig. 7-9 by contrasting them to prior knowledge.

425 The overall trend towards drier conditions simulated by our data-driven model aligns with independent studies. This has

### Comment 6

*L54 “2.2 Meteorological drivers” What is the spatial resolution of the gridded products? What is known about their accuracy, in particular, at high altitudes? How does the time-varying availability of the underlying climate observations affect the reliability of the product, especially in the early part of the period when presumably fewer stations are available?*

The spatial resolution of the meteorological data products (1 km) is now mentioned in the data section.

We added the following paragraph on meteorological data to the limitations section:

In runoff modeling, the quality of meteorological drivers has a large impact on model performance, and both meteorological products used here have known limitations. The TabsD product of air temperature shows a clear relationship between the error and the number of stations used for the interpolation, which results in larger errors in the 1960s and 70s most expressed in  
480 winter months and particularly in the Alps and in Ticino. The linear trend (1961-2010) of interpolated air temperature shows relatively low agreement with the observed trends (Frei, 2014). The RhiresD precipitation product is affected by two primary sources of uncertainty: The rain-gauge measurements are prone to undercatch, leading to underestimation of precipitation particularly with heavy winds and snow in general (Neff, 1977). This leads, in Switzerland, to an underestimation of about 4 % at low elevations and up to 40 % in high altitudes in winter (Sevruk, 1985). From the interpolation, there is a tendency  
485 to overestimate light and underestimate heavy precipitation (MeteoSwiss, 2021b), although these inaccuracies are reduced for areal aggregates such as the catchment averages deployed in the present study. We did not find any information on the accuracy over time, but we expect that the sparser measurement network in the 1960s and 70s leads to larger errors during this period, similar to the TabsD product. We expect that these uncertainties affect our results substantially. We acknowledge that in the early reconstruction period (1960s and 70s), where less measurement stations were available, the reconstruction may  
490 be less trustworthy. The low agreement of interpolated air temperature trends with observations could explain why both the PREVAH and CH-RUN struggle to represent extreme runoff trends. While we did not specifically investigate the representation of extreme runoff events in this study, we expect that the overestimation of low and underestimation of strong precipitation events results in a bias in runoff simulations.

### Comment 7

*Section 3: I do not have expertise in current machine learning methods, and can't comment usefully on most of this section. The model evaluation appears to be well designed.*

### Comment 8

*L258 “Understanding the capabilities of our model necessitates a thorough evaluation of daily runoff simulations” This sentence indicates that a thorough evaluation is about*

*to be presented. However, I think that overstates the analysis which follows. Analyzing model outputs in terms of squared differences between the measured and modeled time series, and then annual means, is a useful, but limited evaluation. There are many other ways to assess the performance of a model (e.g., its ability to reproduce multiple hydrologic signatures of interest). Does the model reproduce flood peaks well? Low flows? Seasonal variation? Recession characteristics? I think that the analysis provided is appropriate for this paper, but it's a stretch to call it a "thorough evaluation", so the phrase should be modified slightly.*

Indeed, the main objective of this paper is the presentation of the methods and the runoff reconstruction product. In this sense, we agree with this comment; our evaluation is a general assessment rather than a thorough one.

The updated part:

#### **4.1.1 Model performance**

To understand the capabilities of our model to represent daily runoff at catchment level, **we evaluate the model performance first**. Figure 3 presents the empirical cumulative density functions for different metrics across the 98 catchments. Models based on the TCN architecture are depicted in blue, those using LSTM networks in red, and the PREVAH model is represented in black. The model with the best performance is emphasized using a thicker line. Panel a focuses on the Nash-Sutcliffe Efficiency (NSE), while panels b–d provide a detailed breakdown of the Mean Squared Error (MSE) into its components – squared bias, variance error, and phase error – as previously introduced.

#### Comment 9

*Sections 4.2 and 4.3: I found the material here very helpful and well presented.*

Thank you.

#### Comment 10

*L352 "under these data-limited conditions" The point about being data limited is made several times. Can you explain why you say that having 98 catchments is data-limited? The spatial coverage of Switzerland is clearly patchy and partial (Figure 1), but that wouldn't matter if spatial correlation lengths were large. Is there an objective method for assessing the extent to which any streamflow dataset contains a large or small amount of information, relative to a space (and time) domain of interest?*

Deep neural networks require a large amount of data to be trained, and especially extreme events are scarce by definition. More data would likely increase the performance of both the LSTM and the TCN (this has been shown by others, but is out of scope of this study), and we hypothesize that a model with more parameters (the TCN) could profit more.

The second point about the information content of a streamflow dataset raises a challenging question. A closely related concept is the "area of applicability" (Meyer et al. (2021); <https://doi.org/10.1111/2041-210X.13650>), which would tell us how well the extrapolation in space is constrained by data. This approach was, however, developed



for static data, and the temporal data we use renders the problem more complex. While we acknowledge the relevance of this question, it falls outside the scope of our study.

#### Comment 11

*L418 “We hypothesize that the negative trend in summer is less related to snowmelt but rather connected to an increase in evapotranspiration via warmer air temperatures,” It still seems possible to me that changes in snowmelt might affect summer streamflow. For what reason do you prefer your alternative explanation? How might such a hypothesis be tested to discriminate between these potential causes? I think that proposing hypotheses in a discussion is a great idea, but it would be good to know that they were testable, at least in principle.*

We do agree that this statement was not supported by our analysis and we will change it in the revised version of the manuscript. The earlier snowmelt could indeed cause lower runoff in the summer months. The main objective of this study is the presentation of a new data product, accompanied by some basic sanity checks. We encourage the testing of such hypotheses by follow-up studies.

The updated part:

contribution to negative trends in later summer. In Ticino, a strong trend towards warmer temperatures has been reported, although precipitation seems to not show significant trends (Reinhard et al., 2005). *The negative trend in summer is likely*  
440 *caused by both a lack of snowmelt and an increase in evapotranspiration via warmer air temperatures, which can have a significant impact on runoff* (Teuling et al., 2013; Goulden and Bales, 2014).

#### Comment 12

*L468 “... is contributing towards the negative decadal trend.” Negative decadal trend in what?*

A negative trend in runoff. We will add this in the revised manuscript.

#### Comment 13

*L469 “... and linked to the summer months” This phrase is vague, and could be made much more specific. What happened in summer? Is it a cause or effect of the drier conditions?*

The trend in runoff was found to be strongest in the summer months. We will rephrase this to clarify.

The updated part:

505 The reconstruction product revealed interesting patterns in long-term runoff trends that align with prior knowledge. Having  
additional reconstruction for the 1960s and 1970s, it seems that increases in the frequency, rather than in the amplitude of  
dry years, as well as a decrease in the frequency of wet years, is contributing towards the negative decadal runoff trend. We  
diagnosed a trend towards lower runoff at the national scale, which was mainly linked to the summer months, where the  
spatial patterns of runoff indicated increasingly dry conditions particularly in mid-to-high altitudes. We encourage the in-depth  
510 investigation of the identified patterns in subsequent studies.

The remaining minor comments will all be adopted in the revised manuscript.

Comment 14

*Table A1 caption “onse” should be “ones”*

Comment 15

*L486 deontes should be denotes*

Comment 16

*L488 temporal\_dropoput should be temporal\_dropout*

Comment 17

*Table A2 caption. The meanings of the columns “allbasins sqrttrans static” are not defined; please refer the reader to the relevant material in section 3*
